# Supplementary material for: Dual heterogeneous structures lead to ultrahigh strength and uniform ductility in a Co-Cr-Ni medium-entropy alloy
Source: PubMed Central journal article supplement (PMC7220923; doi:10.1038/s41467-020-16085-z), 2020-05-13
Supplement: 41467_2020_16085_MOESM1_ESM.pdf [file 41467_2020_16085_MOESM1_ESM.pdf]

1  
2  
3  
4  
5  
6  
7  
8  
9  
10  
11  
12  
13  
14  
15  
16  
17  
18  
19  
20  
21  
22  
23  
24  
25  
26  
27  
28  
29  
30  
31  
32  
33  
34  
35  
36  
37  
38  
39  
40  
41  
42  
43  
44  
45  
46  
47  
48  
49

Supplementary information for

**Dual heterogeneous structures lead to ultrahigh strength and uniform ductility in a Co-Cr-Ni medium-entropy alloy**

Du et al.

50 **Supplementary Note 1. Material Design**

51  
52 The deviation from the component of equi-atomic Ni-Co-Cr ternary alloy, namely,  
53 increasing Co content decreasing Ni content is to reduce the stacking fault energy (SFE)  
54 value of the FCC-structured matrix<sup>1,2</sup>. The Co-rich compositions are desirable owing to the  
55 following purposes (1) To intensify strain strengthening by forming high-density planar  
56 defects during the cold deformation process. (2) To suppress the recrystallization owing to  
57 the increased apparent activation energy of recrystallization<sup>3</sup>. (3) To promote the  
58 precipitation of  $\gamma'$  phase *via* decreasing the solubility of Al and Ti in the  $\gamma$  matrix<sup>4</sup>. In order  
59 to avoid the formation of brittle BCC phase only moderate contents of 3 at% Al and 3 at%  
60 Ti are added to precipitate the  $\gamma'$  phase during the aging process.

100 **Supplementary Note 2. Estimation of the strengthening effect of the hierarchical**  
 101 **precipitates**

102  
 103 Due to the near fully coherent relationship of FCC/L1<sub>2</sub> and ultrafine size, the  
 104 precipitation strengthening L1<sub>2</sub> phase is substantially sheared by the gliding dislocations  
 105 during the deformation. Hence, the strengthening effects of L1<sub>2</sub> phase  $\Delta\sigma_P$  are from three  
 106 contributing factors, i.e., coherency strengthening  $\Delta\sigma_C$ , modulus mismatch strengthening  
 107  $\Delta\sigma_M$  and ordering strengthening  $\Delta\sigma_O$ . The  $\Delta\sigma_C$  and  $\Delta\sigma_M$  play a part prior to the shearing,  
 108 while the last one makes a contribution during the shearing. As a result, the  $\Delta\sigma_P$  is equal to  
 109 the larger one of ( $\Delta\sigma_C$  and  $\Delta\sigma_M$ ) and  $\Delta\sigma_O$ , of which can be expressed as<sup>5</sup>:

$$110 \quad \Delta\sigma_C = M \cdot \alpha_\varepsilon (G \cdot \varepsilon)^{3/2} \left( \frac{rf}{0.5Gb} \right)^{1/2} \quad (1)$$

$$111 \quad \Delta\sigma_M = M \cdot 0.0055 (\Delta G)^{3/2} \left( \frac{2f}{G} \right)^{1/2} \left( \frac{r}{b} \right)^{\frac{3m}{2}-1} \quad (2)$$

$$112 \quad \Delta\sigma_O = 0.81 M \frac{\gamma_{APB}}{2b} \left( \frac{\beta \pi f}{8} \right)^{1/2} \quad (3)$$

113 where the Taylor factor  $M=3.06$ ,  $\alpha_\varepsilon=2.06$  are constants for polycrystalline FCC structure  
 114 and  $G=87$  GPa is the shear modulus of the matrix (taken from the (CoCrNi)<sub>94</sub>Al<sub>3</sub>Ti<sub>3</sub>  
 115 medium-entropy alloy<sup>6</sup>).  $\Delta G=87-77=10$  GPa is the difference of shear modulus between  
 116 FCC matrix and L1<sub>2</sub> precipitate<sup>7</sup>.  $m=0.85$ <sup>8</sup>.  $\gamma_{APB}$  is the antiphase boundaries energy. As  
 117 reported by literature about the Ni-based alloys,  $\gamma_{APB} \approx 0.3$  J/m<sup>29</sup>,  $b = \frac{\sqrt{2}}{2} \alpha_{\text{matrix}} = 0.252$  nm is  
 118 the Burgers vector of the dislocation.  $\varepsilon = 2/3(\Delta\alpha/\alpha)$  is the misfit between matrix and  
 119 precipitate,  $r$  is the mean radius of precipitates and  $f$  is the volume fraction of precipitates,  
 120 where  $n$  is the number density of the precipitates.

121 In this study, the size of (Ni,Co)<sub>3</sub>(Al,Ti) particles precipitated during the annealing  
 122 process are larger than that formed during the aging process. So the overall precipitation  
 123 strengthening effect contributed by these heterogeneous (Ni,Co)<sub>3</sub>(Al,Ti) particles can be  
 124 divided into two parts, namely,

$$125 \quad \Delta\sigma_P = \Delta\sigma_p^I + \Delta\sigma_p^{II} \quad (4)$$

126  $\Delta\sigma_p^I$  is contributed by (Ni,Co)<sub>3</sub>(Al,Ti) particles formed during the annealing process. Where  
 127  $\varepsilon^{II}=0.0056\%$ ,  $r=38.04$  nm,  $f=13.25\%$  (calculated from the APT results by using the level  
 128 rule<sup>10</sup>), Using the above expressions, the values for  $\Delta\sigma_C$ ,  $\Delta\sigma_M$  and  $\Delta\sigma_O$  are calculated as  
 129 1.45 MPa, 116.73 MPa and 585.22 MPa, respectively. As  $\Delta\sigma_C + \Delta\sigma_M$  is far lower than  $\Delta\sigma_O$ ,  
 130 the  $\Delta\sigma_p^I$  is derived from ordering strengthening.

131 Similarly,  $\Delta\sigma_p^{II}$  is contributed by (Ni,Co)<sub>3</sub>(Al,Ti) particles formed during the aging  
 132 process.  $\varepsilon^I=0.011\%$ ,  $r=2.07$  nm and  $f=10.95\%$ . So the values for  $\Delta\sigma_C$ ,  $\Delta\sigma_M$  and  $\Delta\sigma_O$  are  
 133 calculated as 0.85 MPa, 47.68 MPa and 530.14 MPa, respectively. As  $\Delta\sigma_C + \Delta\sigma_M$  is far  
 134 lower than  $\Delta\sigma_O$ , the  $\Delta\sigma_p^I$  is also contributed by ordering strengthening.

135 Based on the above calculation, the precipitation strengthening effect of  
 136 heterogeneous L1<sub>2</sub> phase is estimated to be about 1115 MPa.

142 **Supplementary Table 1. Compositions, structures of matrix, and tensile properties of**  
 143 **the HEAs and MEAs studied previously.**  
 144

| Compositions                                                                           | Matrix | $\sigma_y$ (MPa) | $\sigma_u$ (MPa) | $\varepsilon_{ue}$ (%) | Ref. |
|----------------------------------------------------------------------------------------|--------|------------------|------------------|------------------------|------|
| HfNbTaTiZr                                                                             | BCC    | 1202             | 1295             | 2                      | 11   |
|                                                                                        |        | 1303             | 1334             | 1.9                    |      |
|                                                                                        |        | 1145             | 1262             | 9.7                    |      |
|                                                                                        |        | 1600             | 1900             | 3                      | 12   |
|                                                                                        |        | 1520             | 1520             | 1.7                    |      |
| CoCrFeNiMn                                                                             | FCC    | 1400             | 1750             | 4                      | 13   |
|                                                                                        |        | 930              | 1030             | 2                      |      |
| FeNiCoCu                                                                               | FCC    | 1149             | 1402             | 5                      | 14   |
| (FeNiCoCu) <sub>86</sub> Al <sub>7</sub> Ti <sub>7</sub>                               | FCC    | 1477             | 1849             | 3.4                    |      |
| Cr <sub>15</sub> Fe <sub>20</sub> Co <sub>35</sub> Ni <sub>20</sub> Mo <sub>10</sub>   | FCC    | 1311             | 1410             | 10                     | 15   |
|                                                                                        |        | 1212             | 1360             | 14                     |      |
|                                                                                        |        | 1028             | 1249             | 17                     |      |
|                                                                                        |        | 879              | 1194             | 22                     |      |
|                                                                                        |        | 799              | 1127             | 27                     |      |
| (FeCoNiCr) <sub>94</sub> Ti <sub>2</sub> Al <sub>4</sub>                               | FCC    | 645              | 1094             | 30                     | 16   |
|                                                                                        |        | 1005             | 1273             | 15                     |      |
| TaHfZrTi                                                                               | BCC    | 1300             | 1500             | 2.4                    | 17   |
| Ni <sub>1.5</sub> Co <sub>1.5</sub> CrFeTi <sub>0.5</sub>                              | FCC    | 1308             | 1384             | 4.01                   | 18   |
| Fe <sub>25</sub> Co <sub>25</sub> Ni <sub>25</sub> Al <sub>10</sub> Ti <sub>15</sub>   | FCC    | 1860             | 2520             | 5.2                    | 19   |
| Al <sub>0.5</sub> Cr <sub>0.9</sub> FeNi <sub>2.5</sub> V <sub>0.2</sub>               | FCC    | 1570             | 1763             | 10                     | 20   |
|                                                                                        |        | 1810             | 1905             | 9                      |      |
| Fe <sub>49.5</sub> Mn <sub>30</sub> Co <sub>10</sub> Cr <sub>10</sub> C <sub>0.5</sub> | FCC    | 1300             | 1500             | 1.5                    | 21   |
| (FeCoNi) <sub>86</sub> -Al <sub>7</sub> Ti <sub>7</sub>                                | FCC    | 1028             | 1446             | 46.3                   | 4    |

145  
 146

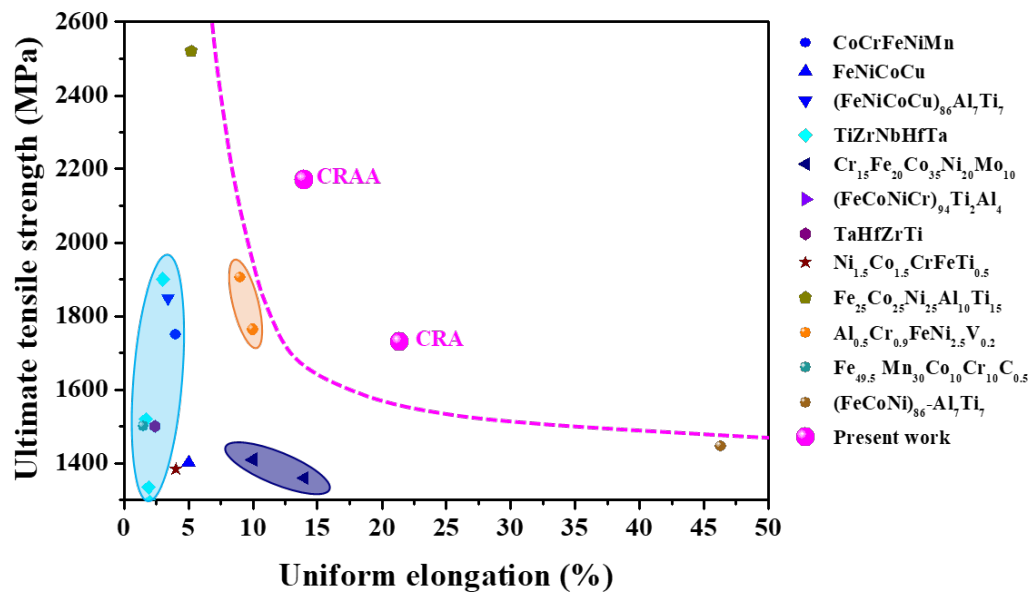

147  
 148  
 149  
 150  
 151  
 152  
 153  
 154  
 155  
 156  
 157  
 158  
 159  
 160  
 161  
 162  
 163  
 164  
 165

**Supplementary Figure 1. Comparison of our developed alloys and other high strength MEAs and HEAs.** Map of uniform elongation ( $\epsilon_{ue}$ ) versus ultimate tensile strength (UTS,  $\sigma_u$ ) reveals the aged alloy achieves a combination of  $\sigma_u$  and  $\epsilon_{ue}$  better than other high strength MEAs and HEAs using FCC or BCC as matrix. The data of the mechanical properties of these reported FCC-based materials are acquired from **Supplementary Table 1**.

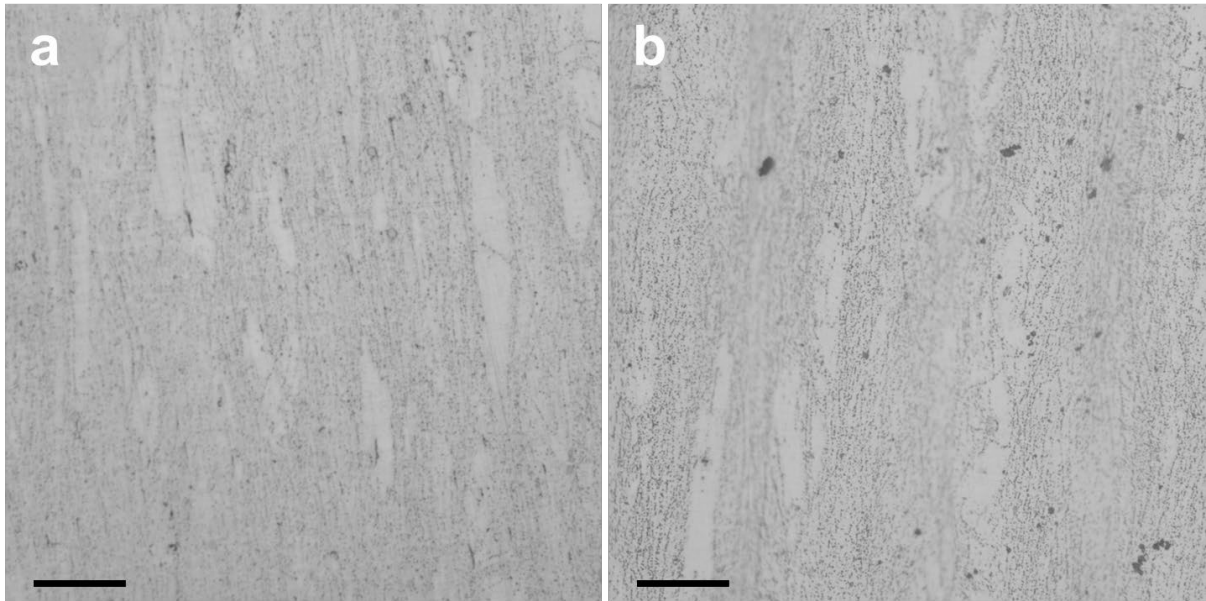

166  
167  
168  
169  
170  
171  
172  
173  
174  
175  
176  
177  
178  
179  
180  
181  
182  
183  
184  
185  
186  
187  
188

**Supplementary Figure 2. Microstructural characterization for the (a) CRA and (b) CRAA alloys, revealing that many bands widely distributed in both CRA and CRAA alloys and surrounded by many fine grains. The scale bars in (a) and (b) are both 50  $\mu\text{m}$ .**

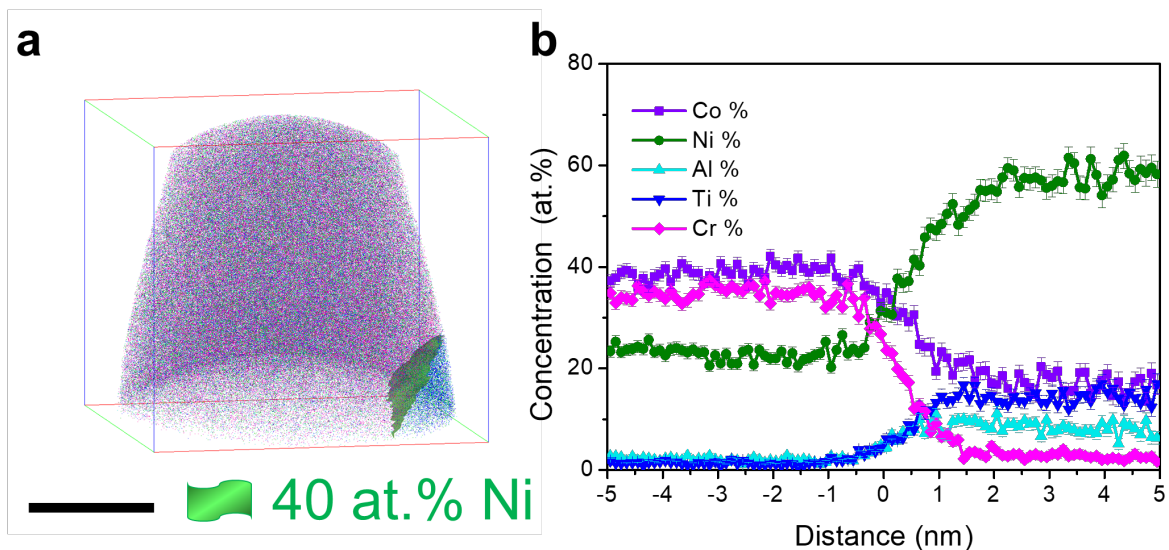

189  
 190  
 191  
 192  
 193  
 194  
 195  
 196

**Supplementary Figure 3. APT results of the CRA alloy. a**, the three-dimensional reconstruction of 40 at% Ni iso-concentration surfaces presenting the morphologies of a particle and matrix, respectively. Scale bar, 20 nm. **b**, one-dimensional concentration profile showing the element distributions from matrix to Ni-enriched particle. Error bars, s.d.



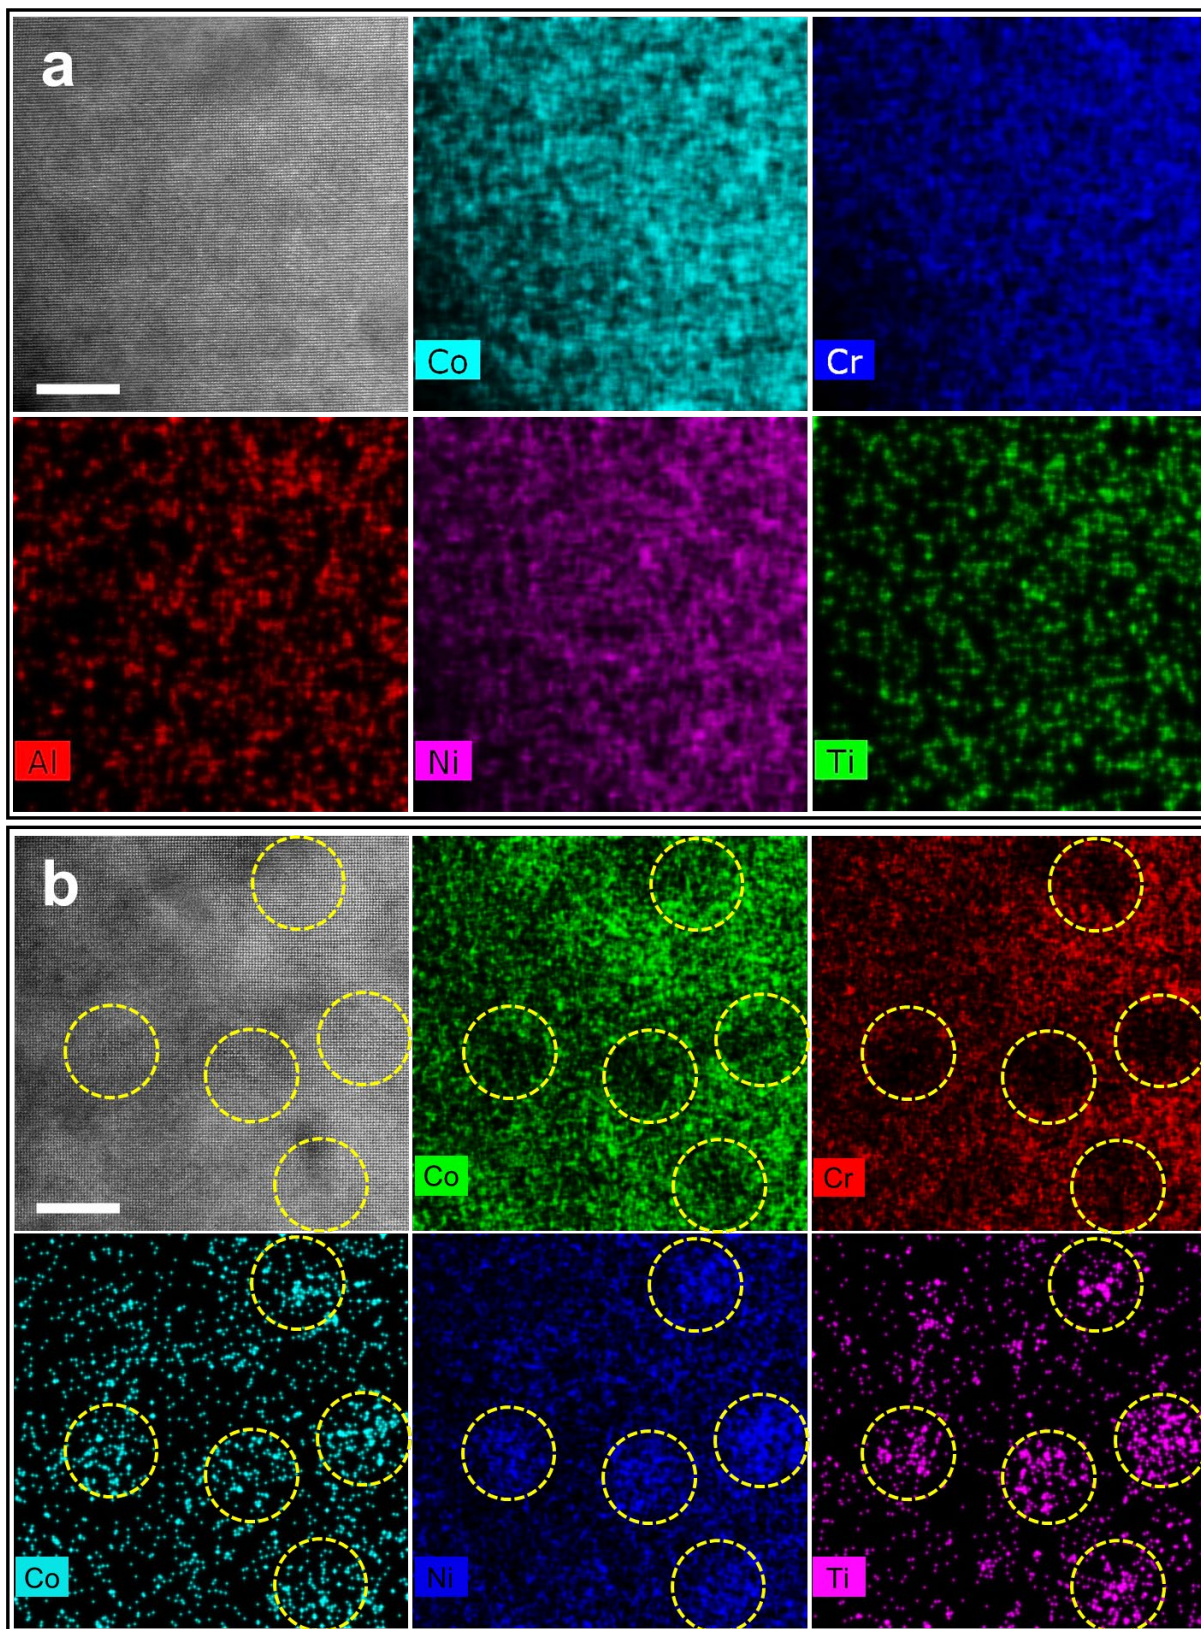

197  
 198 **Supplementary Figure 4. Microstructure difference between CRA and CRAA alloys.**  
 199 Atomic-resolution HAADF-STEM image taken from [001] and corresponding EDS maps of  
 200 **(a)** CRA and **(b)** CRAA alloys, showing that all five elements homogeneously distributed in  
 201 CRA alloy while high-density L1<sub>2</sub> particles (with an average diameter of 4.14±0.62 nm)  
 202 are precipitated in CRAA alloy. The scale bars in **(a)** and **(b)** are both 5 nm.



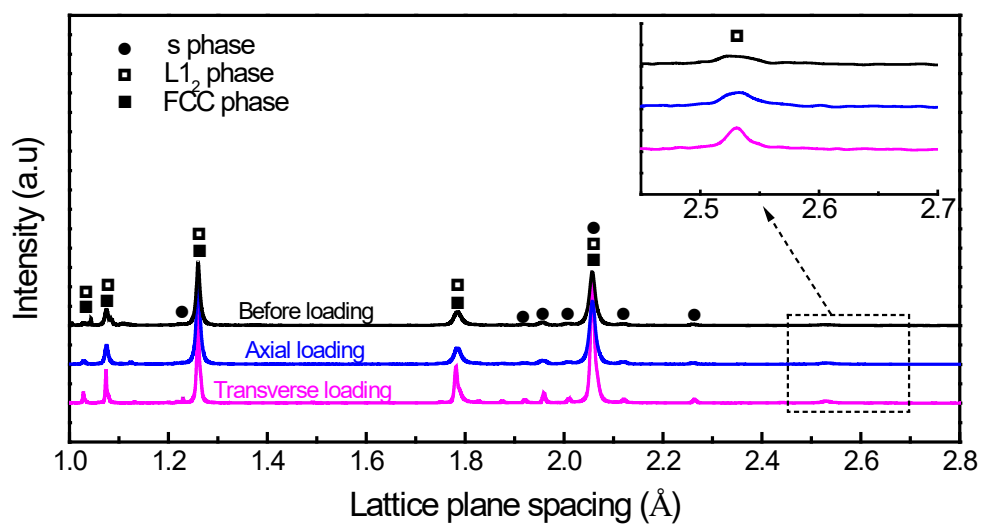

203

204 **Supplementary Figure 5. Synchrotron X-ray diffraction (SXRDR) spectrums of the**  
 205 **without loaded, axially loaded and transversely loaded CRAA samples. It reveals that**  
 206 **no phase transformation occurs during tensile process.**

207

208

209

210

211

212

213

214

215

216

217

218

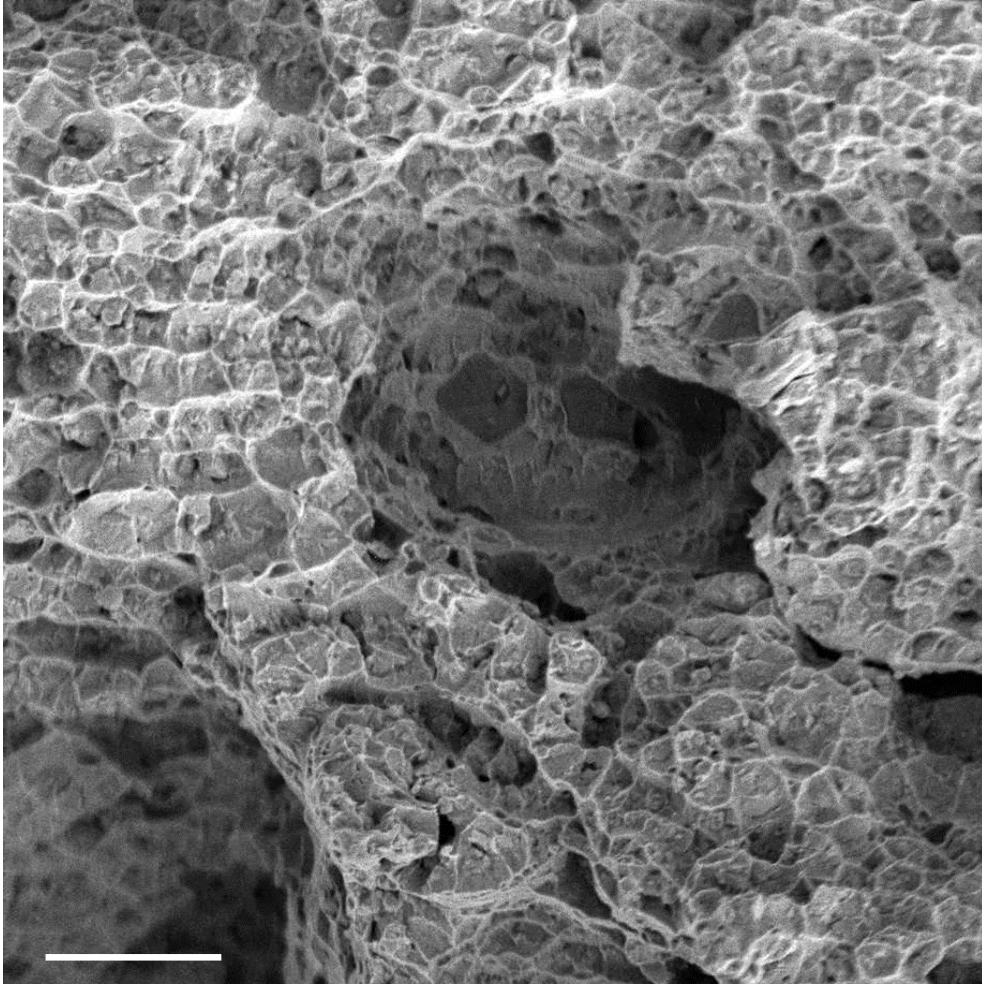

219  
220  
221  
222  
223  
224  
225  
226  
227  
228  
229  
230  
231  
232  
233  
234  
235  
236  
237  
238  
239

**Supplementary Figure 6. The fracture morphology of the CRAA alloy.** The SEM image shows obviously plastic deformation together with a micro-void coalescence fracture mode with fine dimples, indicating an excellent combination of ultra-high strength and good ductility. Scale bar, 5  $\mu\text{m}$ .

## 240 **Supplementary References**

- 241 1 Heslop, J. Wrought nickel-chromium heat-resisting alloys containing cobalt. *Cobalt*  
242 **24**, 128-134, (1964).
- 243 2 Liu, S. F., Wu, Y., Wang, H. T., Lin, W. T., Shang, Y. Y., Liu, J. B., An, K., Liu, X. J.,  
244 Wang, H. & Lu, Z. P. Transformation-reinforced high-entropy alloys with superior  
245 mechanical properties via tailoring stacking fault energy. *Journal of Alloys and*  
246 *Compounds* **792**, 444-455, (2019).
- 247 3 Yang, Z. a., Xiao, Y. & Shi, C. The role of cobalt in the high temperature creep of  
248  $\gamma'$ -strengthened nickel-based superalloys. *Materials Science and Engineering A* **101**,  
249 65-73, (1988).
- 250 4 Yang, T., Zhao, Y. L., Tong, Y., Jiao, Z. B., Wei, J., Cai, J. X., Han, X. D., Chen, D.,  
251 Hu, A., Kai, J. J., Lu, K., Liu, Y. & Liu, C. T. Multicomponent intermetallic  
252 nanoparticles and superb mechanical behaviors of complex alloys. *Science* **362**,  
253 933-937, (2018).
- 254 5 Ardell, A. J. Precipitation hardening. *Metallurgical Transactions A* **16**, 2131-2165,  
255 (1985).
- 256 6 Zhao, Y. L., Yang, T., Tong, Y., Wang, J., Luan, J. H., Jiao, Z. B., Chen, D., Yang, Y.,  
257 Hu, A., Liu, C. T. & Kai, J. J. Heterogeneous precipitation behavior and  
258 stacking-fault-mediated deformation in a CoCrNi-based medium-entropy alloy. *Acta*  
259 *Materialia* **138**, 72-82, (2017).
- 260 7 Pollock, T. M. & Argon, A. S. Creep resistance of CMSX-3 nickel base superalloy  
261 single crystals. *Acta Metallurgica Et Materialia* **40**, 1-30.
- 262 8 Gerold, V. & Pham, H.-M. Precipitation hardening by misfitting particles and its  
263 comparison with experiments. *Scripta Metallurgica* **13**, 0-898.
- 264 9 Raynor, D. & Silcock, J. M. Strengthening Mechanisms in  $\gamma'$  Precipitating Alloys.  
265 *Metal Science Journal* **4**, 121-130, (1970).
- 266 10 Gardner, H., Pedrazzini, S., Douglas, J. O., De Lille, D., Moody, M. P. & Bagot, P. A.  
267 J. Atom Probe Tomography Investigations of Microstructural Evolution in an Aged  
268 Nickel Superalloy for Exhaust Applications. *Metallurgical and Materials*  
269 *Transactions A* **50**, 1862-1872, (2019).
- 270 11 Senkov, O. N. & Semiatin, S. L. Microstructure and properties of a refractory  
271 high-entropy alloy after cold working. *Journal of Alloys and Compounds* **649**,  
272 1110-1123, (2015).
- 273 12 Schuh, B., Völker, B., Todt, J., Schell, N., Perrière, L., Li, J., Couzinié, J. P. &  
274 Hohenwarter, A. Thermodynamic instability of a nanocrystalline, single-phase  
275 TiZrNbHfTa alloy and its impact on the mechanical properties. *Acta Materialia* **142**,  
276 201-212, (2018).
- 277 13 Shahmir, H., He, J., Lu, Z., Kawasaki, M. & Langdon, T. G. Effect of annealing on  
278 mechanical properties of a nanocrystalline CoCrFeNiMn high-entropy alloy  
279 processed by high-pressure torsion. *Materials Science and Engineering: A* **676**,  
280 294-303, (2016).
- 281 14 Zheng, R., Chen, J., Xiao, W. & Ma, C. Microstructure and tensile properties of  
282 nanocrystalline (FeNiCoCu)<sub>1-x</sub>Ti<sub>x</sub>Al<sub>x</sub> high entropy alloys processed by high  
283 pressure torsion. *Intermetallics* **74**, 38-45, (2016).

- 284 15 Ming, K., Bi, X. & Wang, J. Precipitation strengthening of ductile Cr 15 Fe 20 Co 35  
285 Ni 20 Mo 10 alloys. *Scripta Materialia* **137**, 88-93, (2017).
- 286 16 He, J. Y., Wang, H., Huang, H. L., Xu, X. D., Chen, M. W., Wu, Y., Liu, X. J., Nieh,  
287 T. G., An, K. & Lu, Z. P. A precipitation-hardened high-entropy alloy with  
288 outstanding tensile properties. *Acta Materialia* **102**, 187-196, (2016).
- 289 17 Huang, H., Wu, Y., He, J., Wang, H., Liu, X., An, K., Wu, W. & Lu, Z.  
290 Phase-Transformation Ductilization of Brittle High-Entropy Alloys via Metastability  
291 Engineering. *Adv Mater* **29**, (2017).
- 292 18 Moravcik, I., Cizek, J., Zapletal, J., Kovacova, Z., Vesely, J., Minarik, P., Kitzmantel,  
293 M., Neubauer, E. & Dlouhy, I. Microstructure and mechanical properties of  
294 Ni<sub>1,5</sub>Co<sub>1,5</sub>CrFeTi<sub>0,5</sub> high entropy alloy fabricated by mechanical alloying and  
295 spark plasma sintering. *Materials & Design* **119**, 141-150, (2017).
- 296 19 Fu, Z. Q., Jiang, L., Wardini, J. L., MacDonald, B. E., Wen, H. M., Xiong, W., Zhang,  
297 D. L., Zhou, Y. Z., Rupert, T. J., Chen, W. P. & Lavernia, E. J. A high-entropy alloy  
298 with hierarchical nanoprecipitates and ultrahigh strength. *Sci. Adv.* **4**, 8, (2018).
- 299 20 Liang, Y. J., Wang, L., Wen, Y., Cheng, B., Wu, Q., Cao, T., Xiao, Q., Xue, Y., Sha,  
300 G., Wang, Y., Ren, Y., Li, X., Wang, L., Wang, F. & Cai, H. High-content ductile  
301 coherent nanoprecipitates achieve ultrastrong high-entropy alloys. *Nat Commun* **9**,  
302 4063, (2018).
- 303 21 Su, J., Raabe, D. & Li, Z. Hierarchical microstructure design to tune the mechanical  
304 behavior of an interstitial TRIP-TWIP high-entropy alloy. *Acta Materialia* **163**,  
305 40-54, (2019).
- 306
